# Supplementary material for: S119N Mutation of the E3 Ubiquitin Ligase SPOP Suppresses SLC7A1 Degradation to Regulate Hepatoblastoma Progression
Source: PubMed Central journal article supplement — Mol Ther Oncolytics. 2020 Oct 4;19:149–62. doi: 10.1016/j.omto.2020.09.008 (PMC7644817; doi:10.1016/j.omto.2020.09.008), 2020-10-04
Supplement: mmc1.pdf [file mmc1.pdf]

OMTO, Volume 19

## **Supplemental Information**

### **S119N Mutation of the E3 Ubiquitin Ligase SPOP**

### **Suppresses SLC7A1 Degradation to Regulate**

### **Hepatoblastoma Progression**

**Weijing He, Jingjing Zhang, Baihui Liu, Xiangqi Liu, Gongbao Liu, Lulu Xie, Jiajun He, Meng Wei, Kai Li, Jing Ma, Rui Dong, Duan Ma, Kuiran Dong, and Mujie Ye**

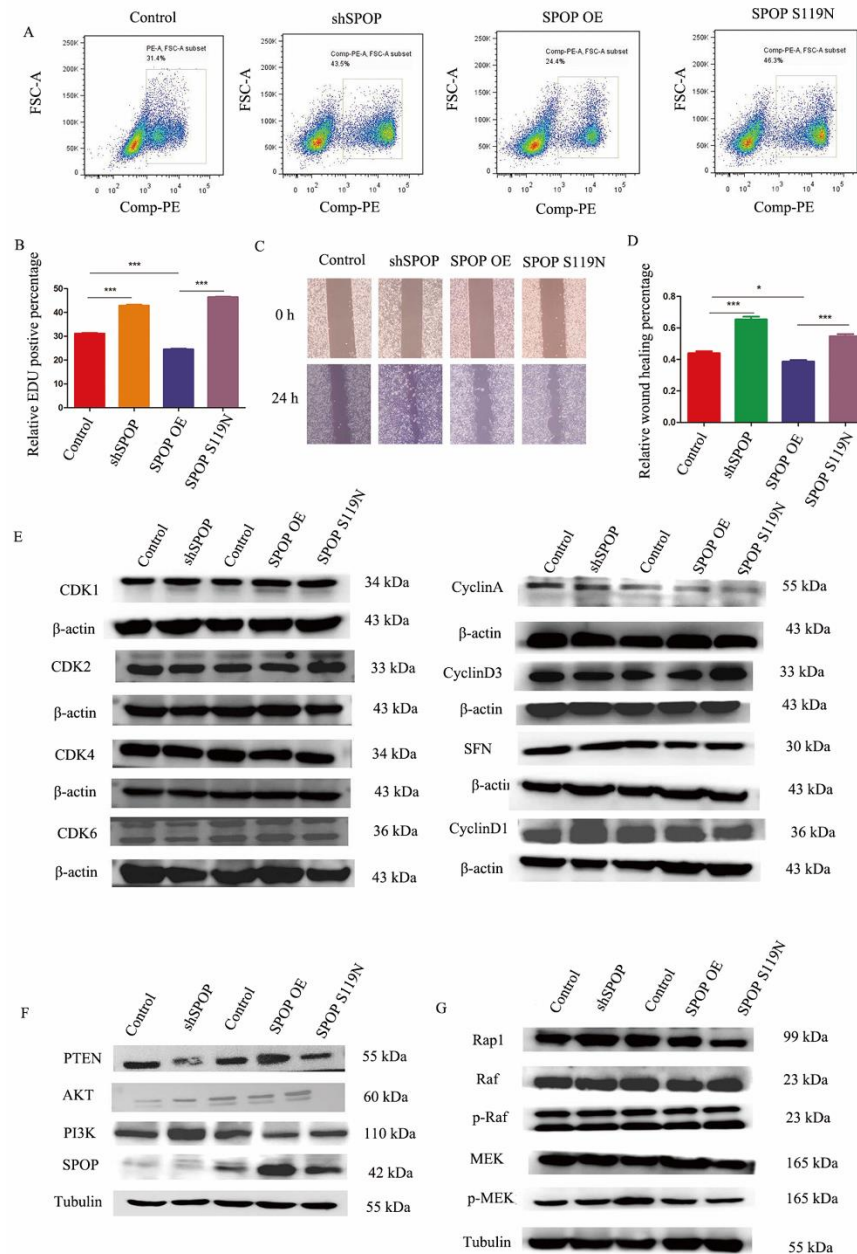

**Figure S1. Impact on other phenotypes and signaling pathways.**

(A and B) Relative EDU-positive percentage shown in the control, shSPOP, SPOP OE, or SPOP S119N group in HepG2 cells. (C and D) Relative wound-healing percentage shown after 0 and 24 h in HepG2 cells. (E) Western blot analysis for cell cycle proteins showed no difference in the control, shSPOP, SPOP OE, or SPOP S119N groups in HepG2 cells. (F) PI3K/Akt signaling pathway was activated by SPOP knockdown and S119N mutation, but inhibited by SPOP over-expression. (G) Rap/Raf/MEK signaling pathway showed no difference in the control, shSPOP, SPOP OE, or SPOP S119N groups in HepG2 cells.

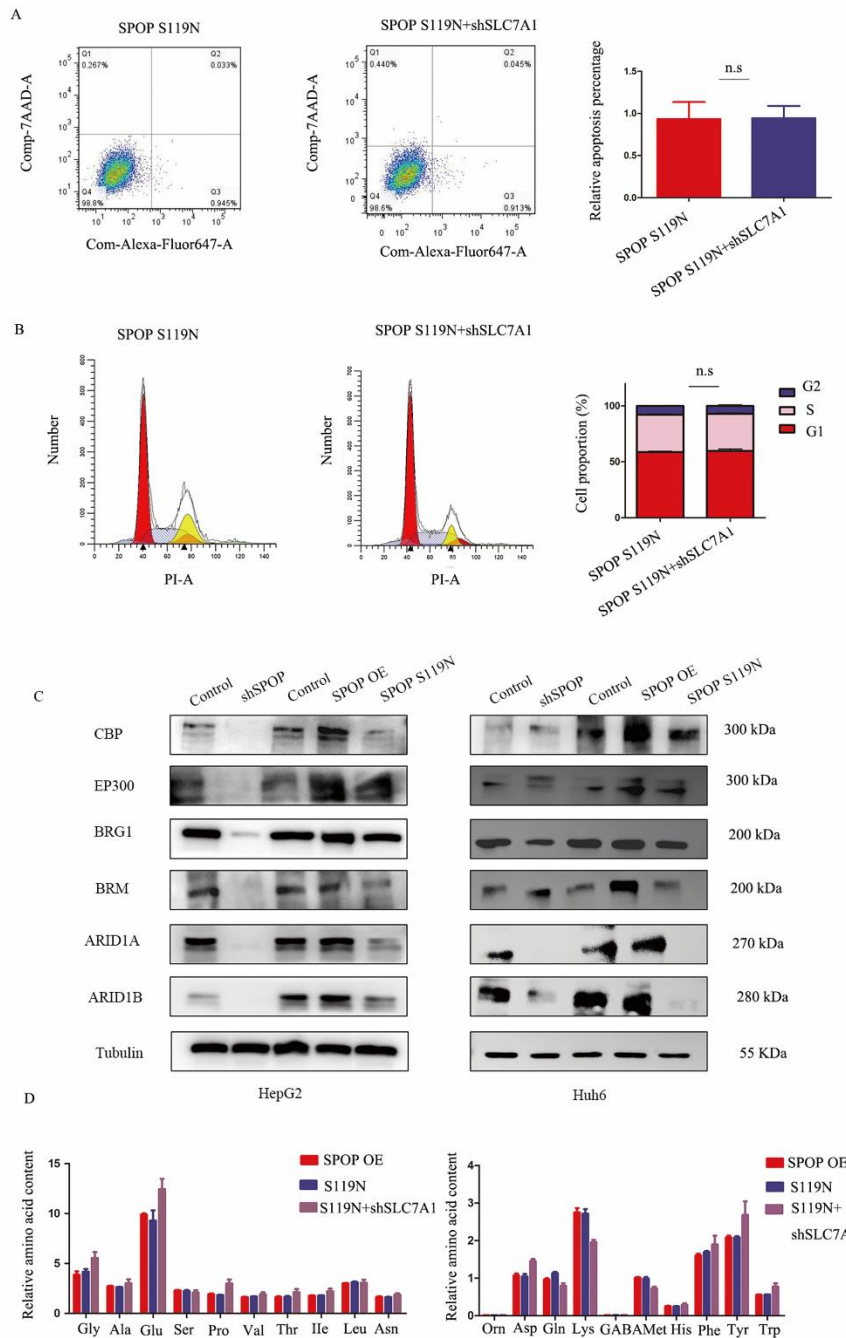

**Figure S2. SPOP had an influence on SWI/SNF complex and arginine metabolism.**

(A) Representative results and statistical analysis of apoptosis by flow cytometry in SPOP S119N, and down-regulation of SLC7A1 in SPOP S119N of HepG2 cells. (B) Representative results and cell cycle analysis by flow cytometry in SPOP S119N, and down-regulation of SLC7A1 in SPOP S119N of HepG2 cells. (C) Western blot analysis showed SWI/SNF complex proteins decreased in SPOP knockdown and S119N mutation groups, but increased in the SPOP over-expressed groups.

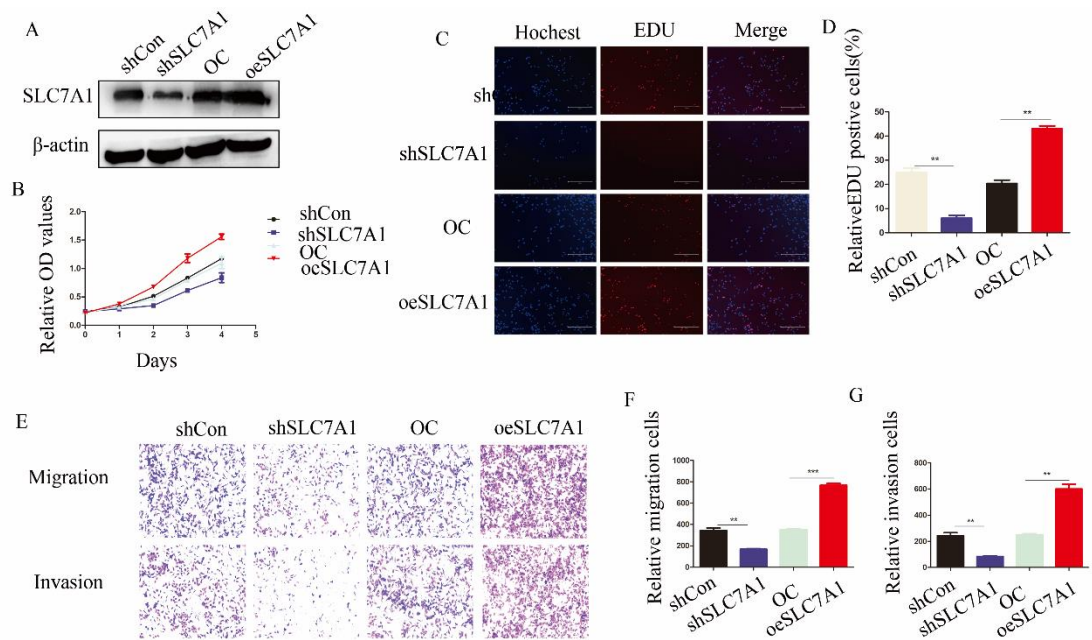

**Figure S3. Down-regulation of SLC7A1 inhibited HepG2 cell proliferation, migration, and invasion.**

(A) Western blot analysis showed down-regulation and up-regulation efficiency of SLC7A1. (B) CCK8 assay indicated that the silencing of SLC7A1 decreased cell proliferation, and the over-expression of SLC7A1 increased cell proliferation. (C and D) EDU assay results also showed that the knockdown of SLC7A1 inhibited cell proliferation, while the over-expression of SLC7A1 promoted cell proliferation. (E–G) Transwell assays showed that the down-regulation of SLC7A1 inhibited cell migration, invasion, and the over-expression of SLC7A1 promoted cell migration.

TableS1

**Antibody information**

| <b>Antibody</b>  | <b>Vendor</b> | <b>Catalog number</b> |
|------------------|---------------|-----------------------|
| SPOP             | Proteintech   | 16750-1-AP            |
| GAPDH            | Proteintech   | 60004-1-Ig            |
| $\beta$ -Tubulin | Proteintech   | 10068-1-AP            |
| $\beta$ -Actin   | Proteintech   | 60008-1-Ig            |
| p21              | CST           | 2947T                 |
| P27              | CST           | 3686T                 |
| E-cadherin       | CST           | 3195T                 |
| Vimentin         | Santa Cruz    | Sc-6206               |
| N-cadherin       | Proteintech   | 22018-1-AP            |
| PI3K             | Proteintech   | 20584-1-AP            |
| AKT              | CST           | 4691T                 |
| ERK              | CST           | 4695T                 |
| p-ERK            | CST           | 4370T                 |
| p38              | CST           | 8690T                 |
| p-p38            | CST           | 4511T                 |
| SLC7A1           | Proteintech   | 14195-1-AP            |
| CDK1             | Proteintech   | 19532-1-AP            |
| CDK2             | Proteintech   | 0122-1-AP             |
| CDK4             | Proteintech   | 11026-1-AP            |
| CDK6             | Proteintech   | 14052-1-AP            |
| CyclinA          | CST           | 91500S                |
| CyclinD1         | Proteintech   | 60186-1-Ig            |
| CyclinD3         | Proteintech   | 26755-1-AP            |
| SFN              | Santa Cruz    | Sc-166473             |
| PTEN             | Santa Cruz    | Sc-7974               |
| Rap1             | Santa Cruz    | Sc-28366              |
| Raf              | Santa Cruz    | Sc-101504             |
| p-Raf            | Santa Cruz    | Sc-271929             |
| MEK              | Santa Cruz    | Sc-5294               |
| p-MEK            | Santa Cruz    | Sc-166967             |
| BRG1             | Santa Cruz    | Sc-374197             |
| BRM              | CST           | 11966T                |
| CBP              | CST           | 7389S                 |
| p300             | CST           | 86377S                |
| ARID1A           | CST           | 12354S                |
| ARID1B           | CST           | 92964S                |
